# Supplementary material
Source: publisher site journal article supplement (https://www.dovepress.com/article/320202)
Supplement: Supplementary file 1 [file get_supplementary_file.php]

**Supplementary file 1:** Histogram showing uniocular results for UDVA(n=54 eyes) and CDVA obtained following implantation of Optiflex trio trifocal IOL at 12 months post-operatively


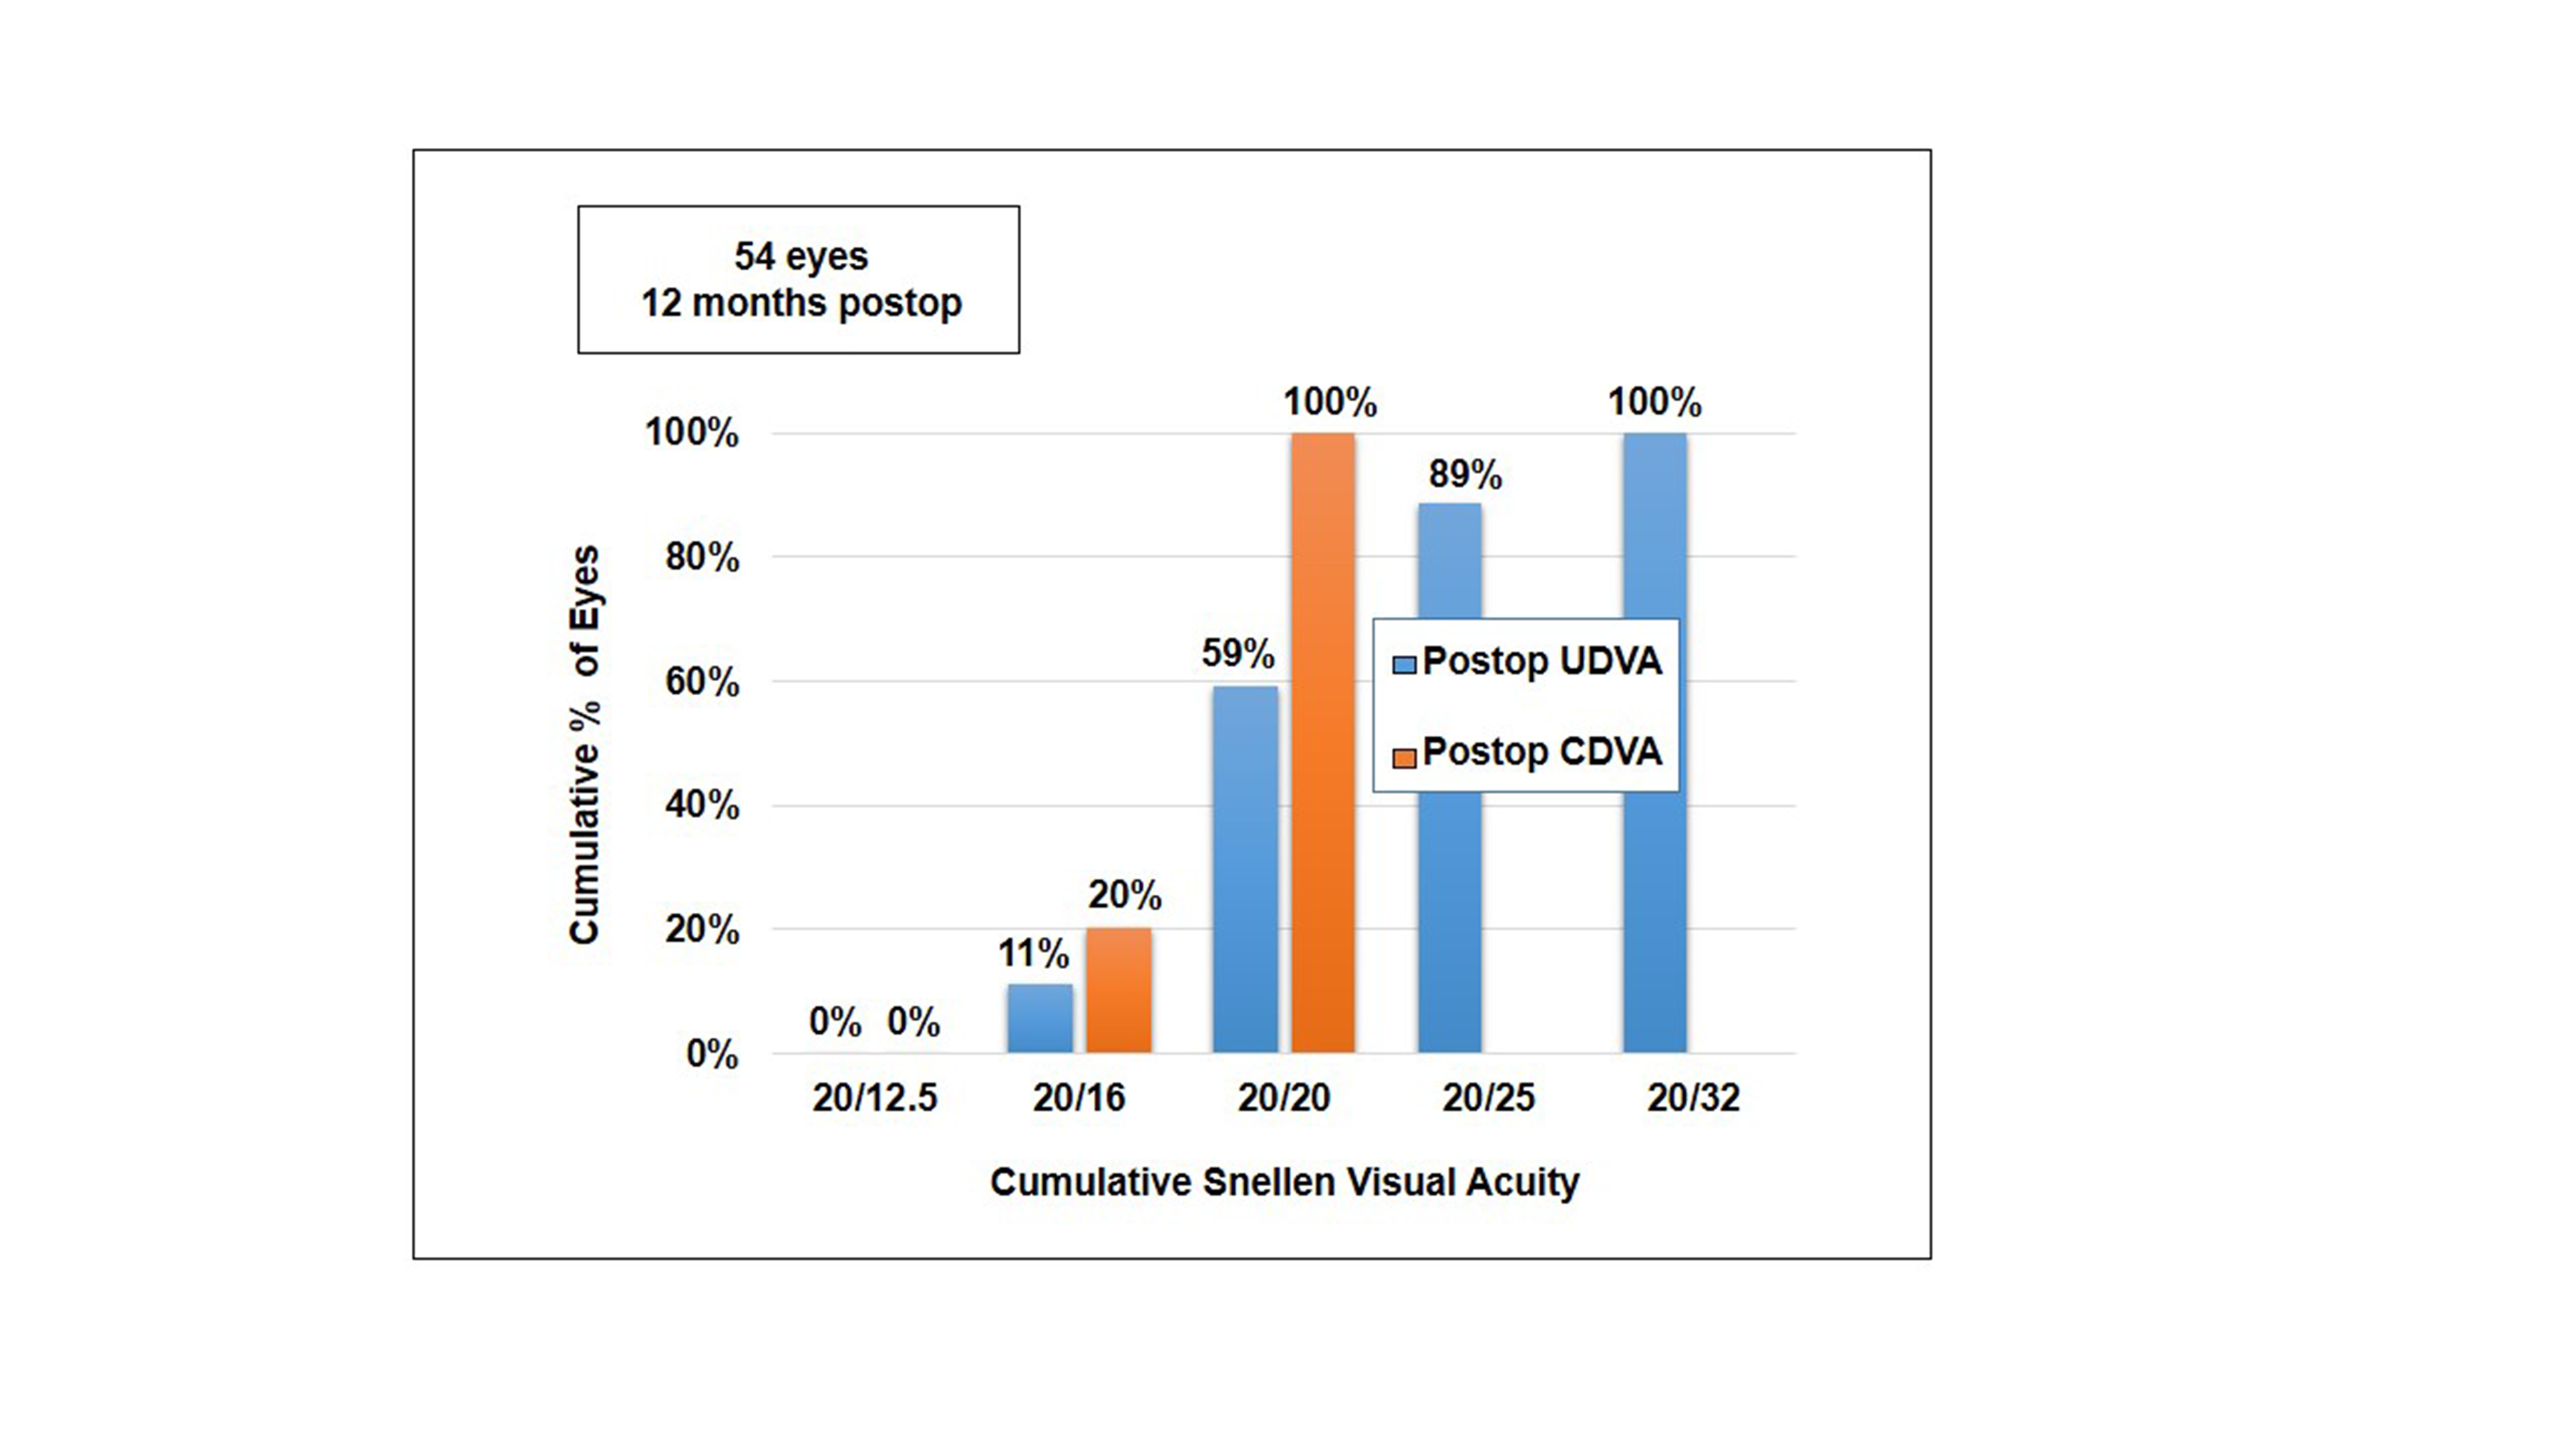


**Supplementary file 2:** Histogram showing change in Snellen’s lines of post-operative UDVA versus CDVA at 12 months post-op.


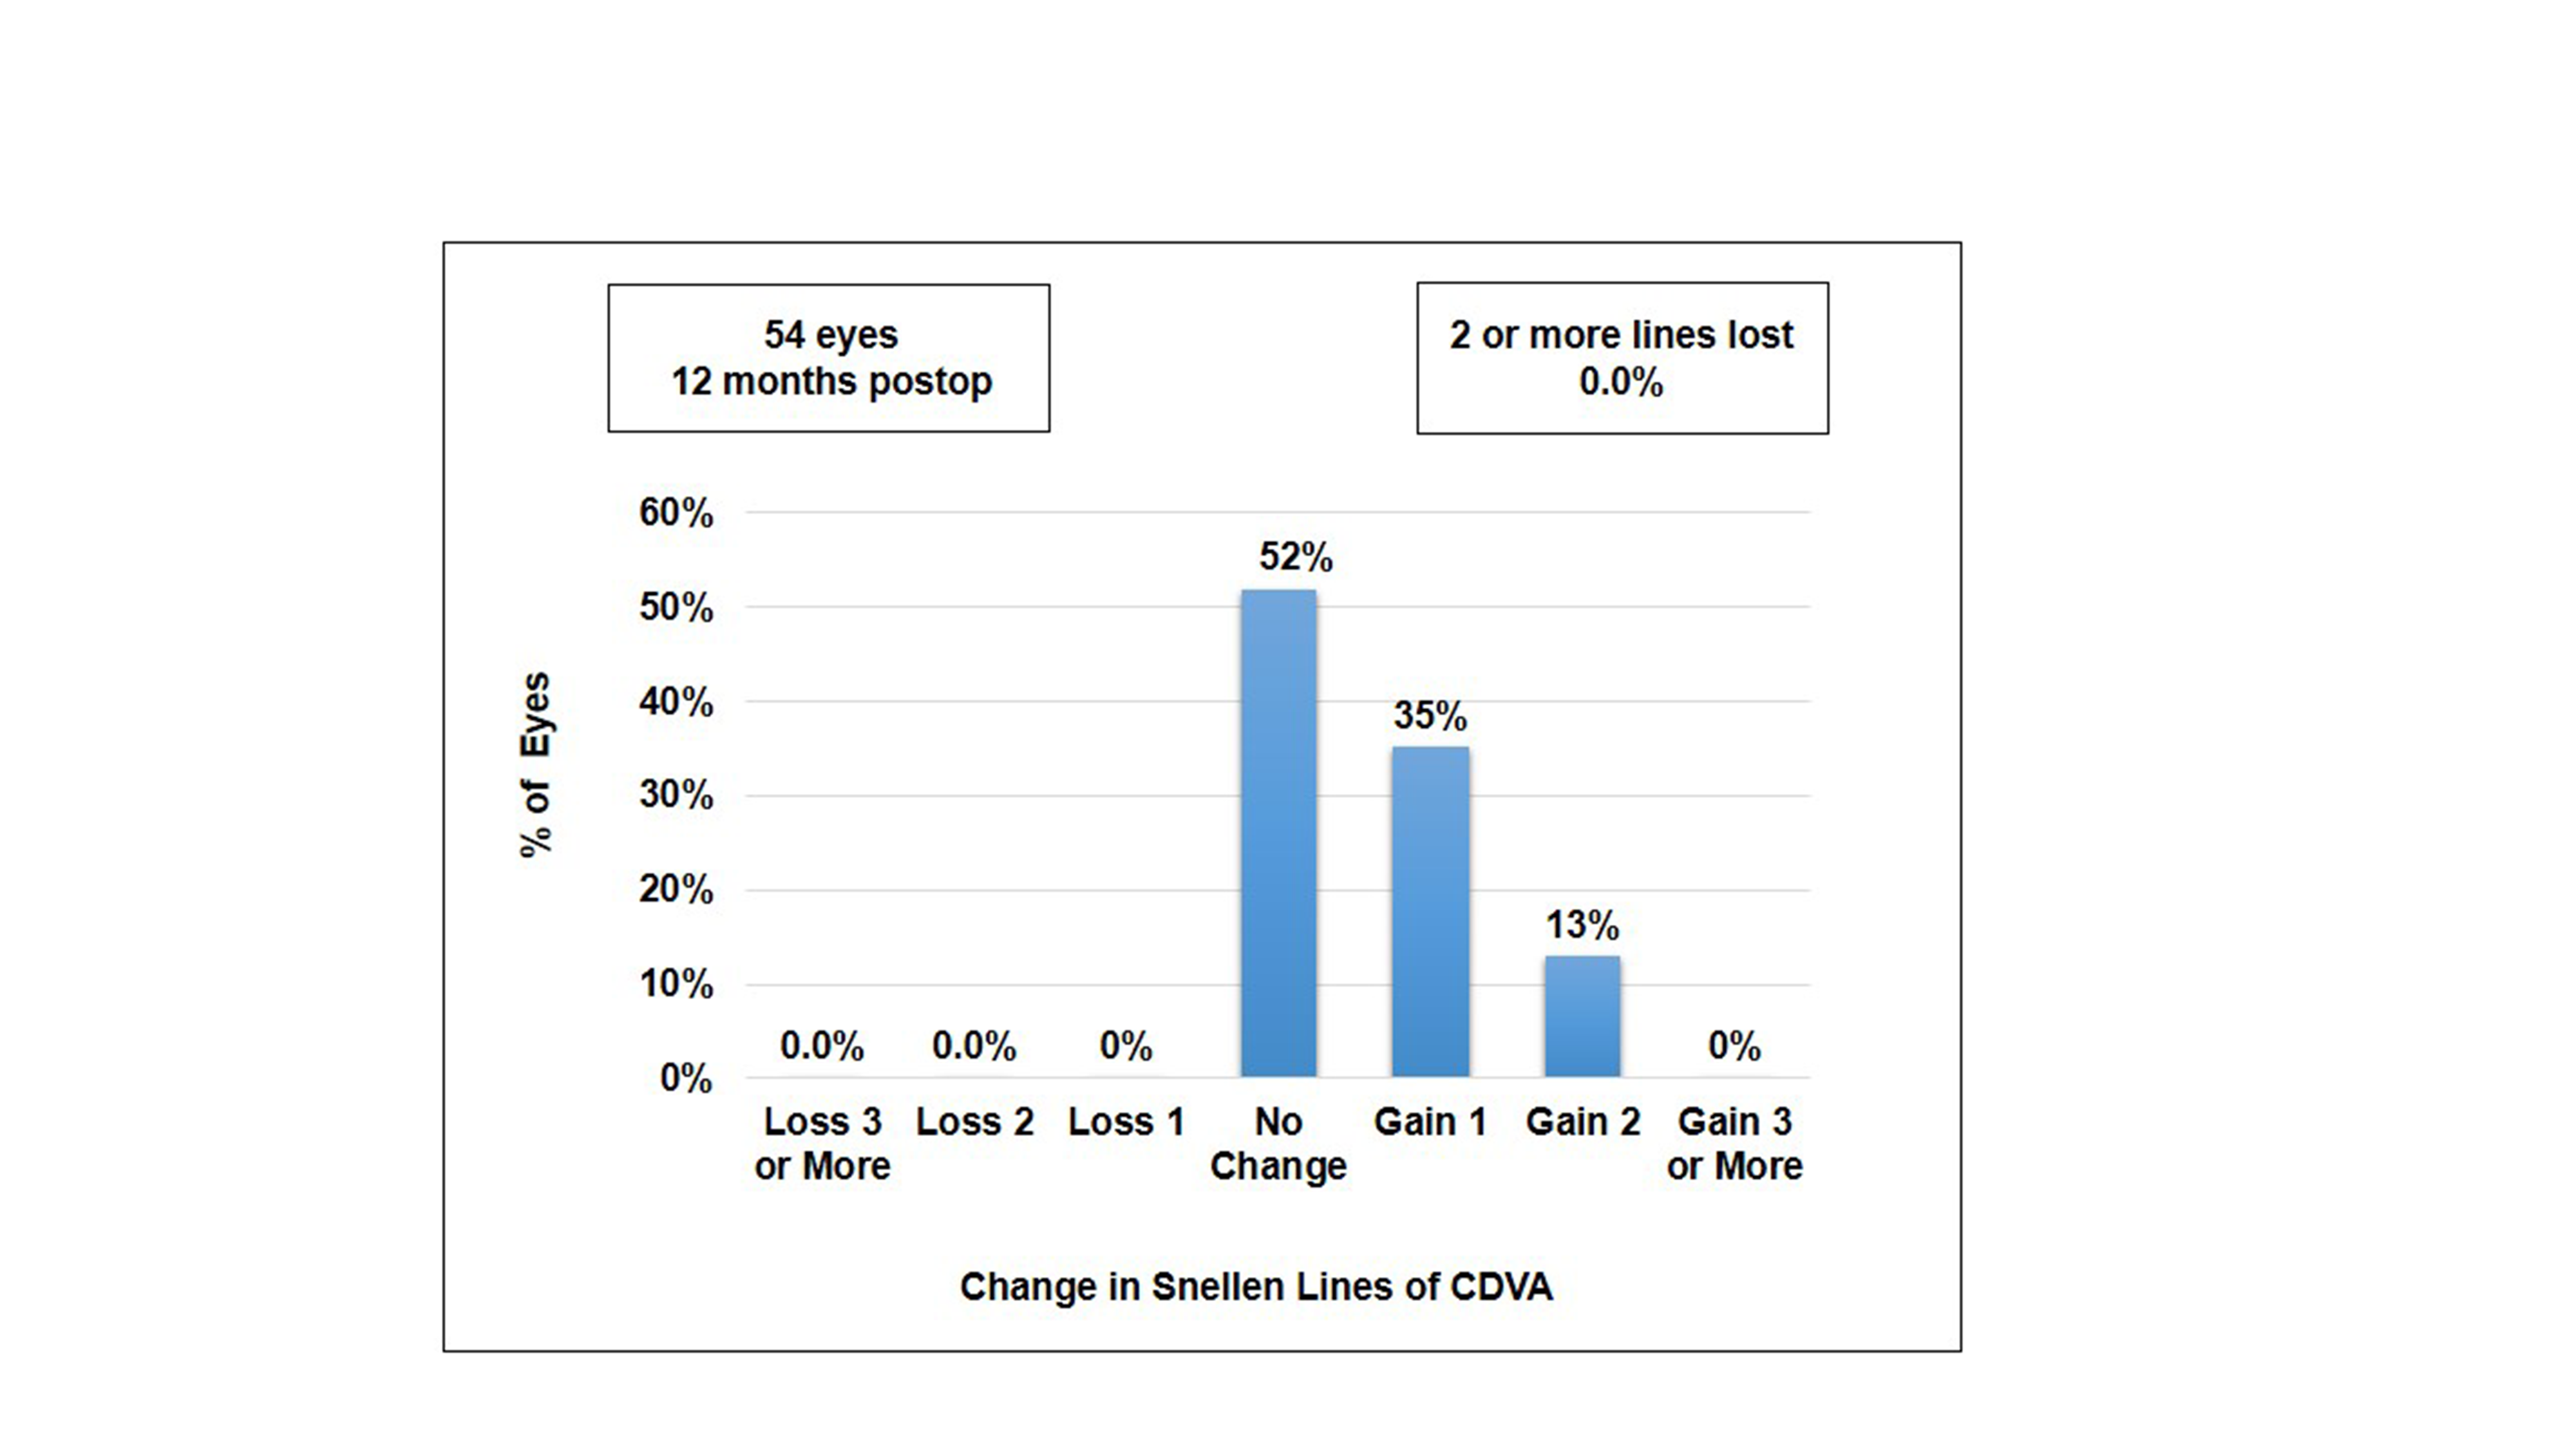


**Supplementary file 3:** Quality of vision (QOV) and patient satisfaction scores obtained at 3, 6 and 12 months post-op.

|  | **3 months** | **6 months** | **12 months** | **p-value** |
| --- | --- | --- | --- | --- |
| DYSPHOTOPSIA SYMPTOMS (0-10)  [0-2 MILD, 3-7 MODERATE 8-10 SEVERE] | | | | |
|  | 3.11±0.43 | 1.26±0.96 | 0.61±0.49 | <0.005 |
| SPECTACLE INDEPENDENCE SCORE (0-10)  [FEEL THE NEED TO USE GLASSES] | | | | |
| **Distance** | 9.49±0.16 | 9.54±0.08 | 9.56±0.09 | 0.26 |
| **Intermediate** | 9.48±0.15 | 9.53±0.07 | 9.55±0.09 | 0.25 |
| **Near** | 9.19±0.36 | 9.22±0.36 | 9.25±0.36 | 0.83 |
| OVERALL PATIENT SATISFACTION SCORE (0-100) | | | | |
|  | 93.88±4.66 | 94.88±4.29 | 97.07±2.23 | 0.41 |
